# Supplementary material for: Verification of the Relationship between Redox Regulation of Thioredoxin Target Proteins and Their Proximity to Thylakoid Membranes
Source: MDPI journal article supplement (doi:10.3390/antiox11040773), 2022-04-13
Supplement: s1 [file s1]

## Supplementary Materials

**Table S1.** Primers used in this study.

| Name                              | Sequence (5' to 3')                |
|-----------------------------------|------------------------------------|
| TM <sub>APX</sub> _F <sup>a</sup> | AAAGTCGACGAGCTTTCGGATTCGATGAAAAAG  |
| TM <sub>APX</sub> _R <sup>a</sup> | ATCGAGCTCTTAGAAACCAGAGAAATCGGAGTTG |
| transit-SBPase_F <sup>b,c</sup>   | TGATACATATGGAGACCAGCATCGC          |
| transit-SBPase_R <sup>b</sup>     | CACCATTGCTCTTAGCTTTTG              |
| pET_SBPase_R <sup>c</sup>         | ATTGTCGACGTGATGATGGTGGTGGTCTCGAGAG |

a: Primers used for TM<sub>APX</sub> fragment preparation. The underlined parts indicate the restriction enzyme recognition sites.

b: Primers used for the preparation of SBPase fragment fused with chloroplast transit signal peptides.

c: A primer used for the overlap extension PCR.
